# Supplementary material
Source: publisher site journal article supplement (https://www.dovepress.com/article/558704)
Supplement: Supplementary file 1 [file 558704%20Supplementary%20Material.pdf]

S1: Fig 4 lncRNA NONHSAT248596.1 regulates human OA chondrocyte degeneration by sequestering mi R-146a-5p to modulate the SDF-1/CXCR4 axis . (F) Expression of collagen II and aggrecan was analyzed Western blot. (Fig 4F WB full non-adjusted images)

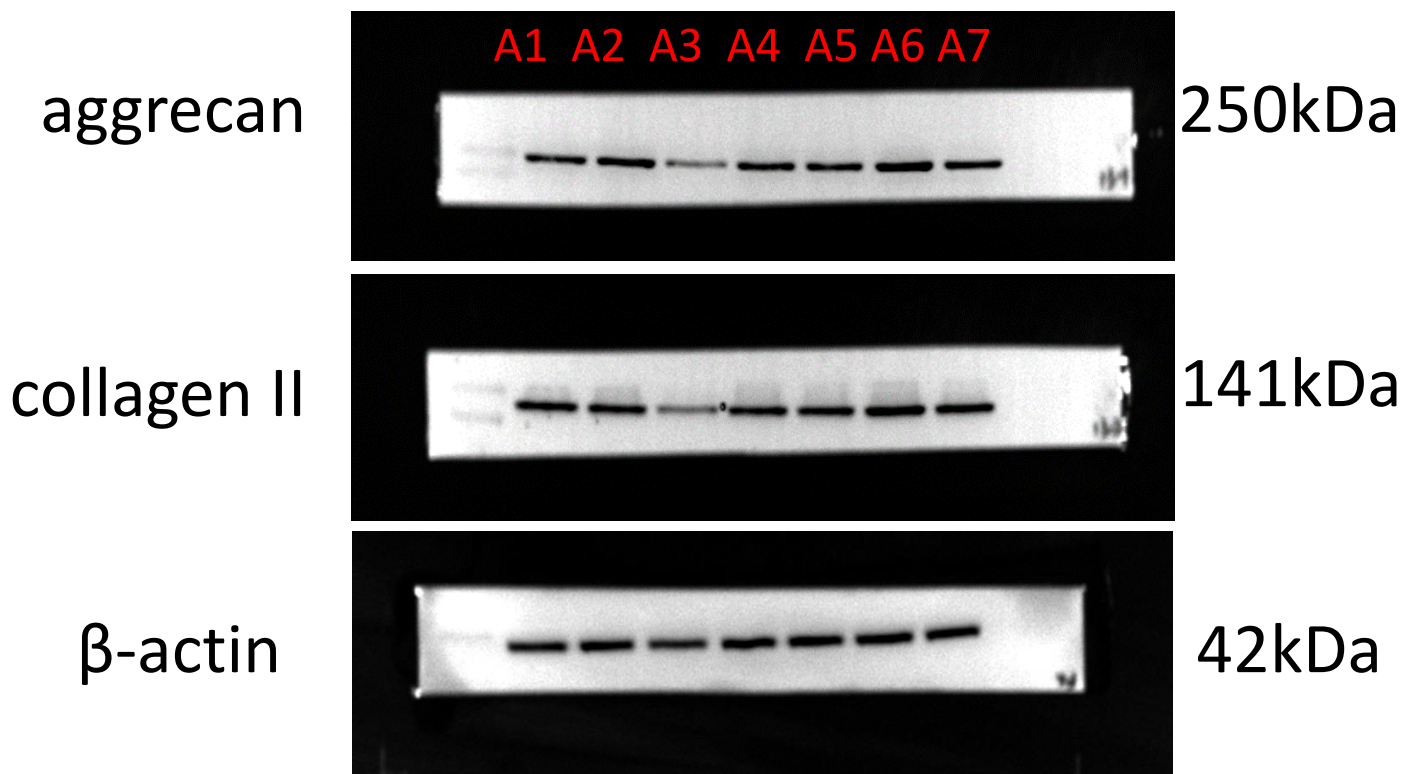

|                                   | Western blot | Protein Molecular Weight (kDa) |
|-----------------------------------|--------------|--------------------------------|
| aggrecan (abcam ab3778)           | 1:1000       | 250                            |
| collagen II(abcam ab188570)       | 1:1000       | 141                            |
| B-actin (Zhongsuan Jinqiao TA-09) | 1:2000       | 42                             |

**S2: Fig 7A** The effect of NONHSAT248596.1 on aggrecan and col-II protein expression levels within cartilage tissue by Western blot. (WB full non-adjusted images)

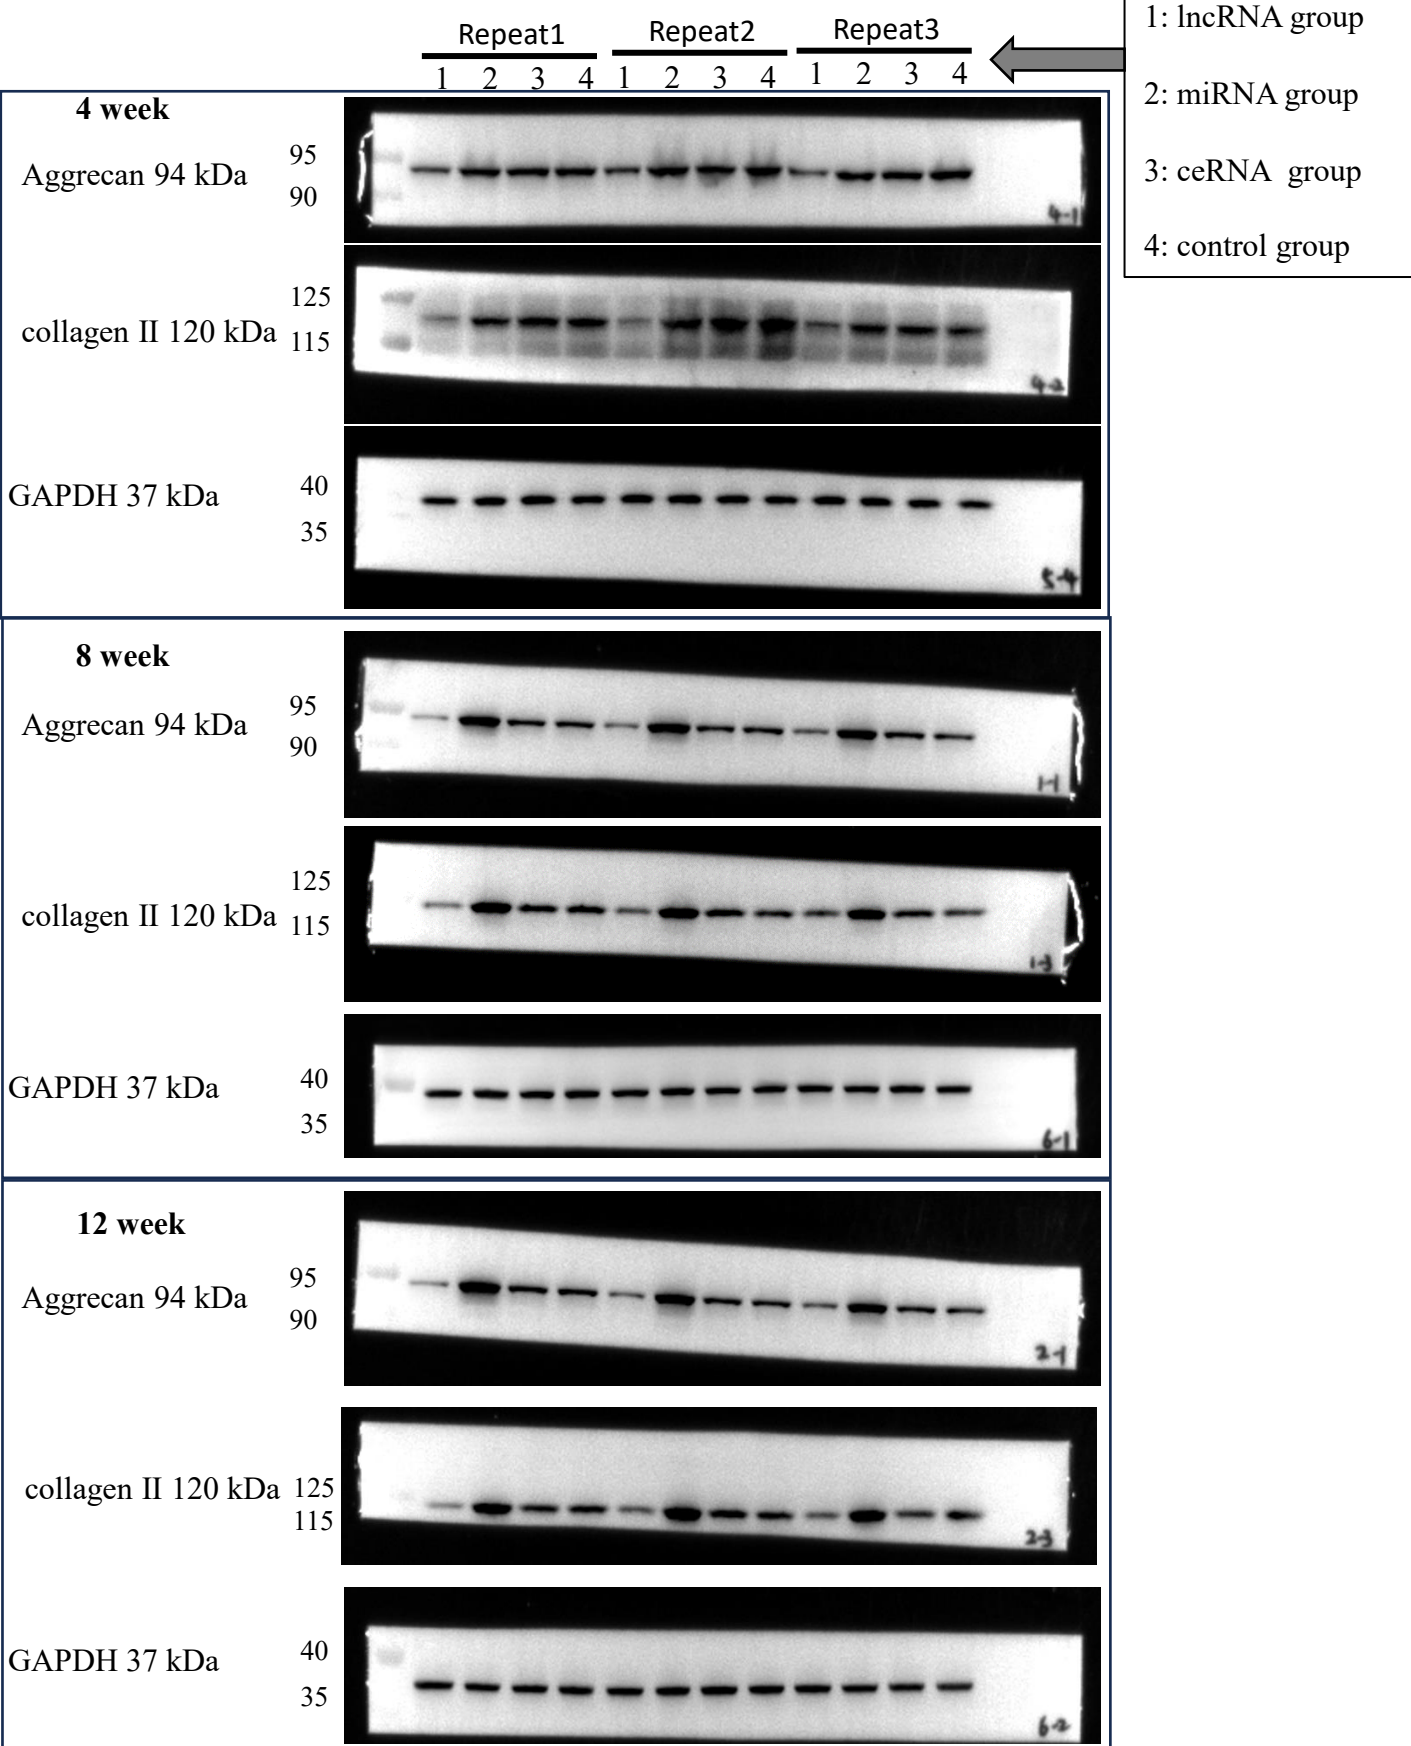

|                               | Western blot | Protein Molecular Weight (kDa) |
|-------------------------------|--------------|--------------------------------|
| Aggrecan (Novus NBP2-29670)   | 1:1000       | 94                             |
| Collagen II (Absin abs120144) | 1:1000       | 120                            |
| GAPDH (abmart P30008)         | 1:2000       | 37                             |
